# Supplementary material for: Cytoplasmic retention of the DNA/RNA-binding protein FUS ameliorates organ fibrosis in mice
Source: PubMed Central journal article supplement (PMC10940094; doi:10.1172/jci175158), 2024-03-15

Figure 5

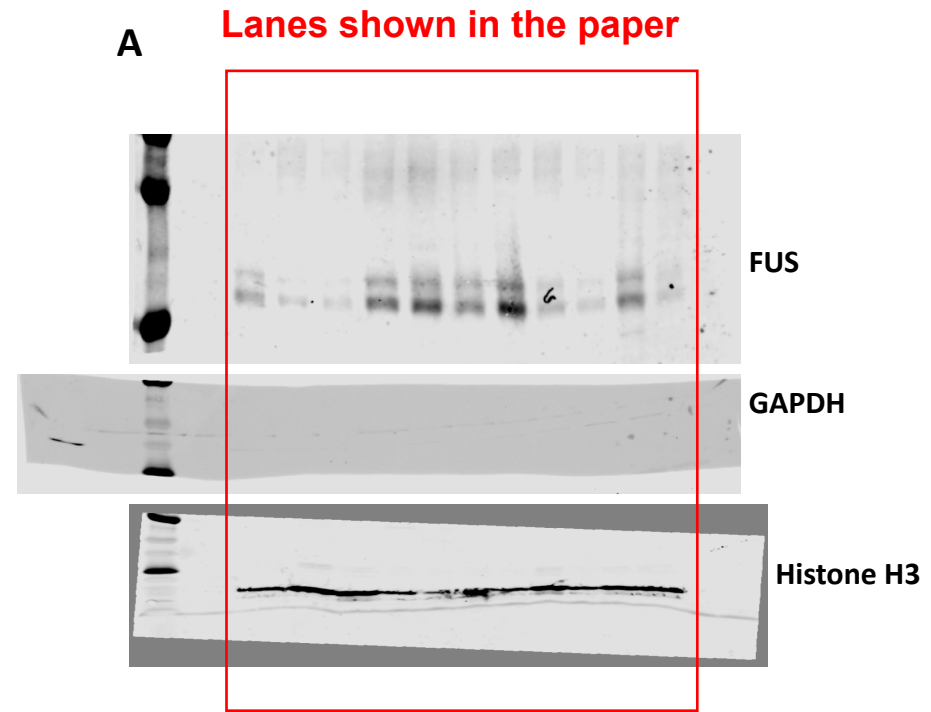

**Figure 8**

**A**

**Lanes shown in the paper**

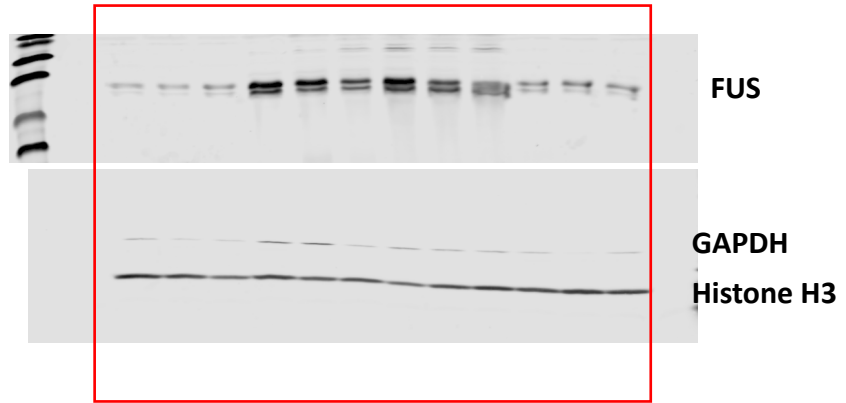

**B**

**Lanes shown in the paper**

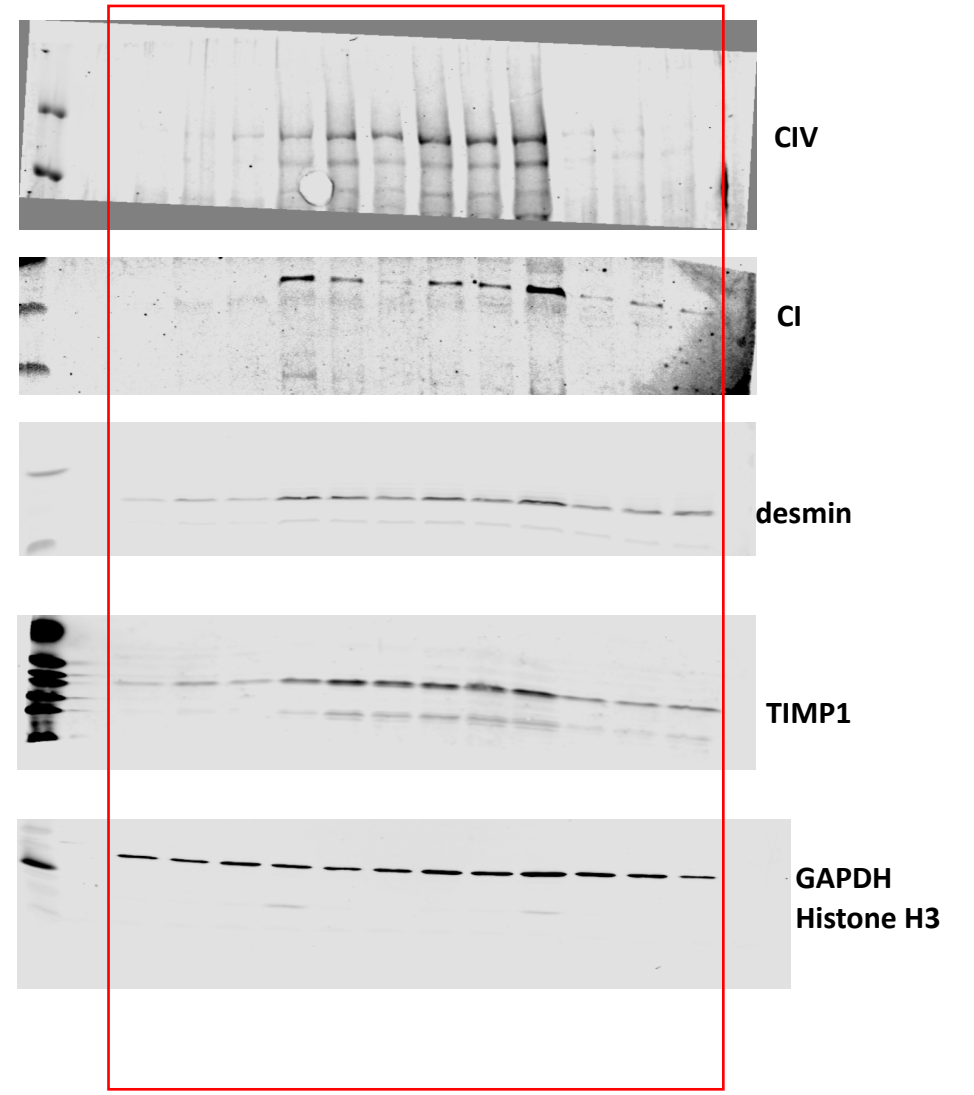

**Figure 9**

**A**

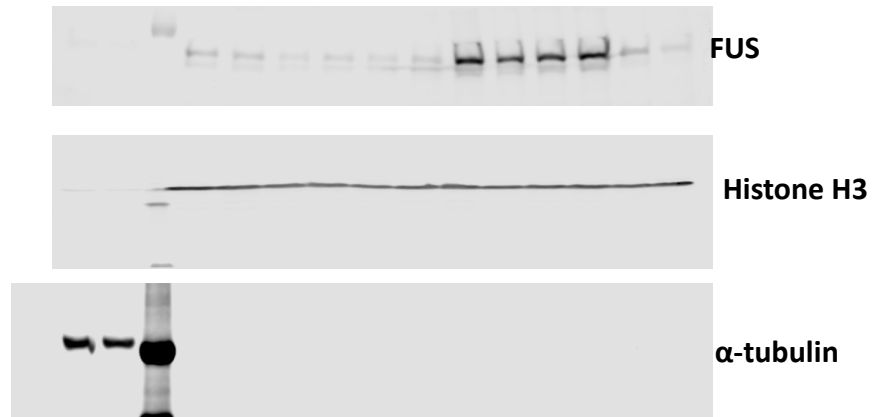

**C**

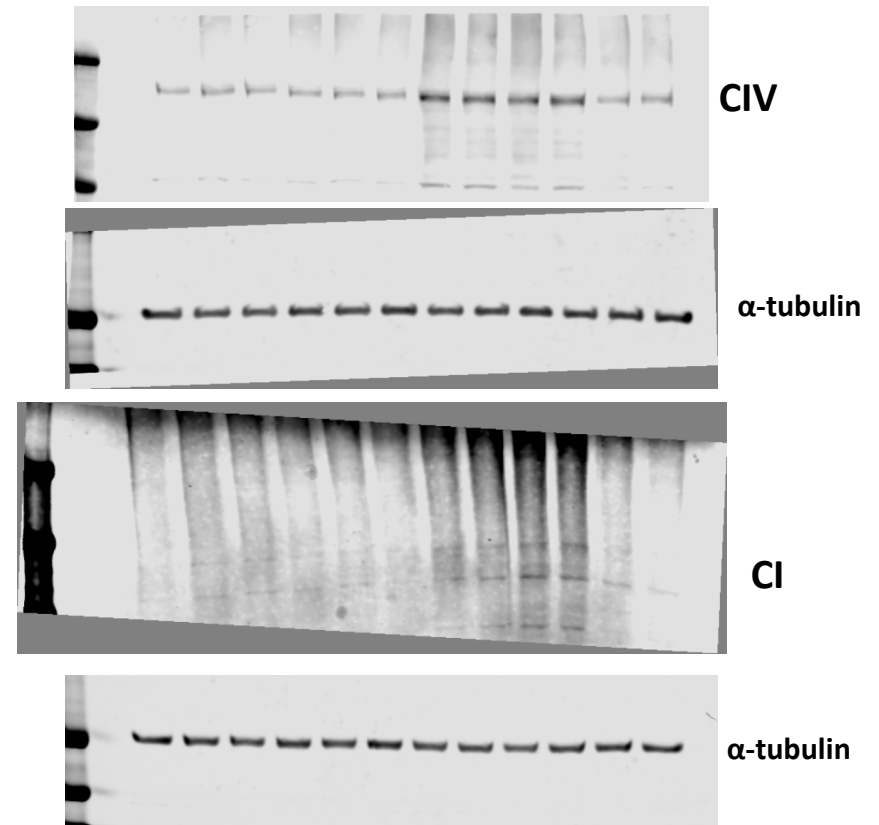

Supplemental Fig. 2

A

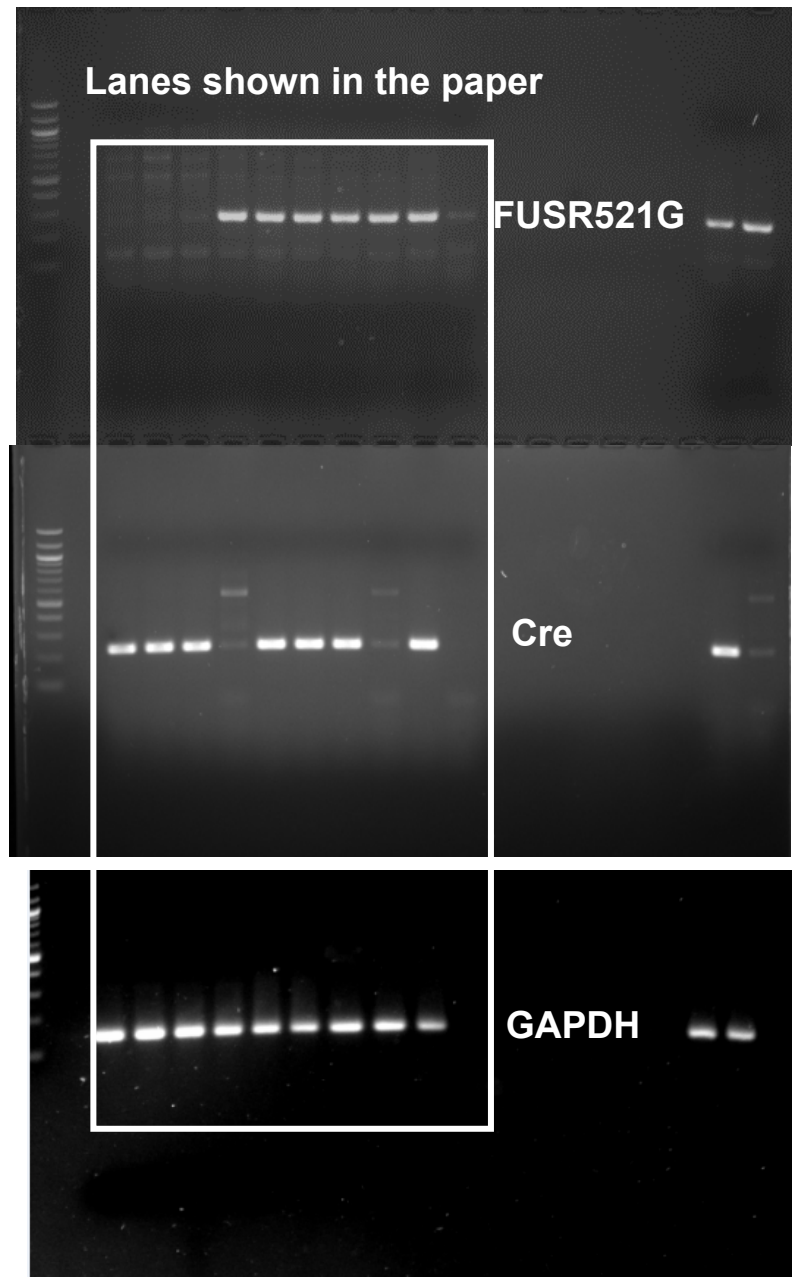

C

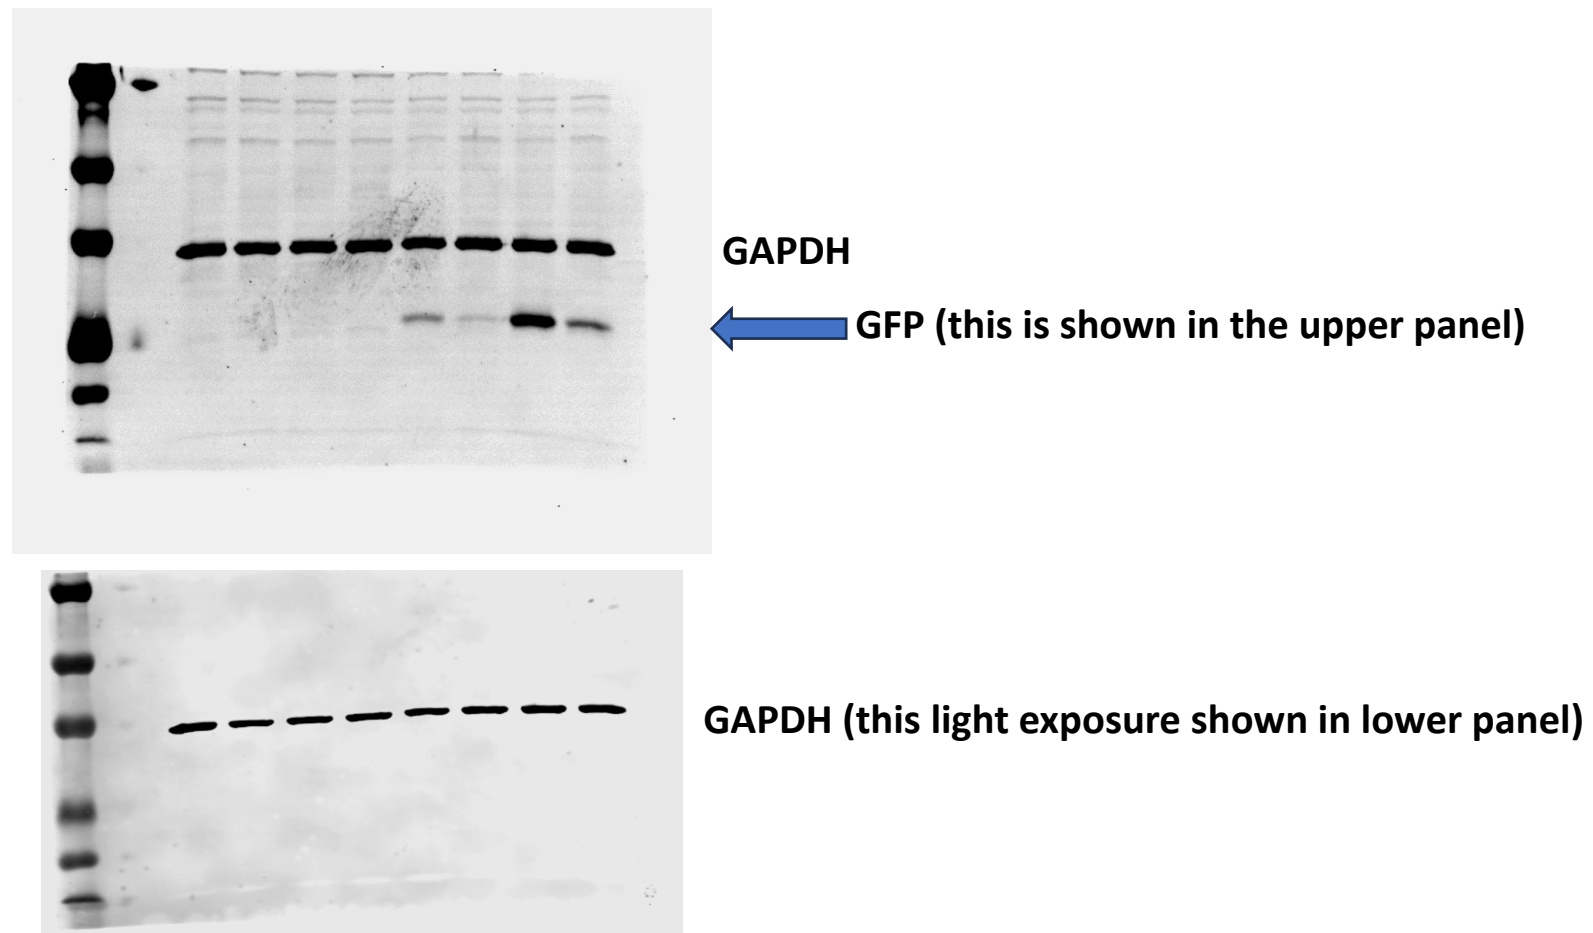

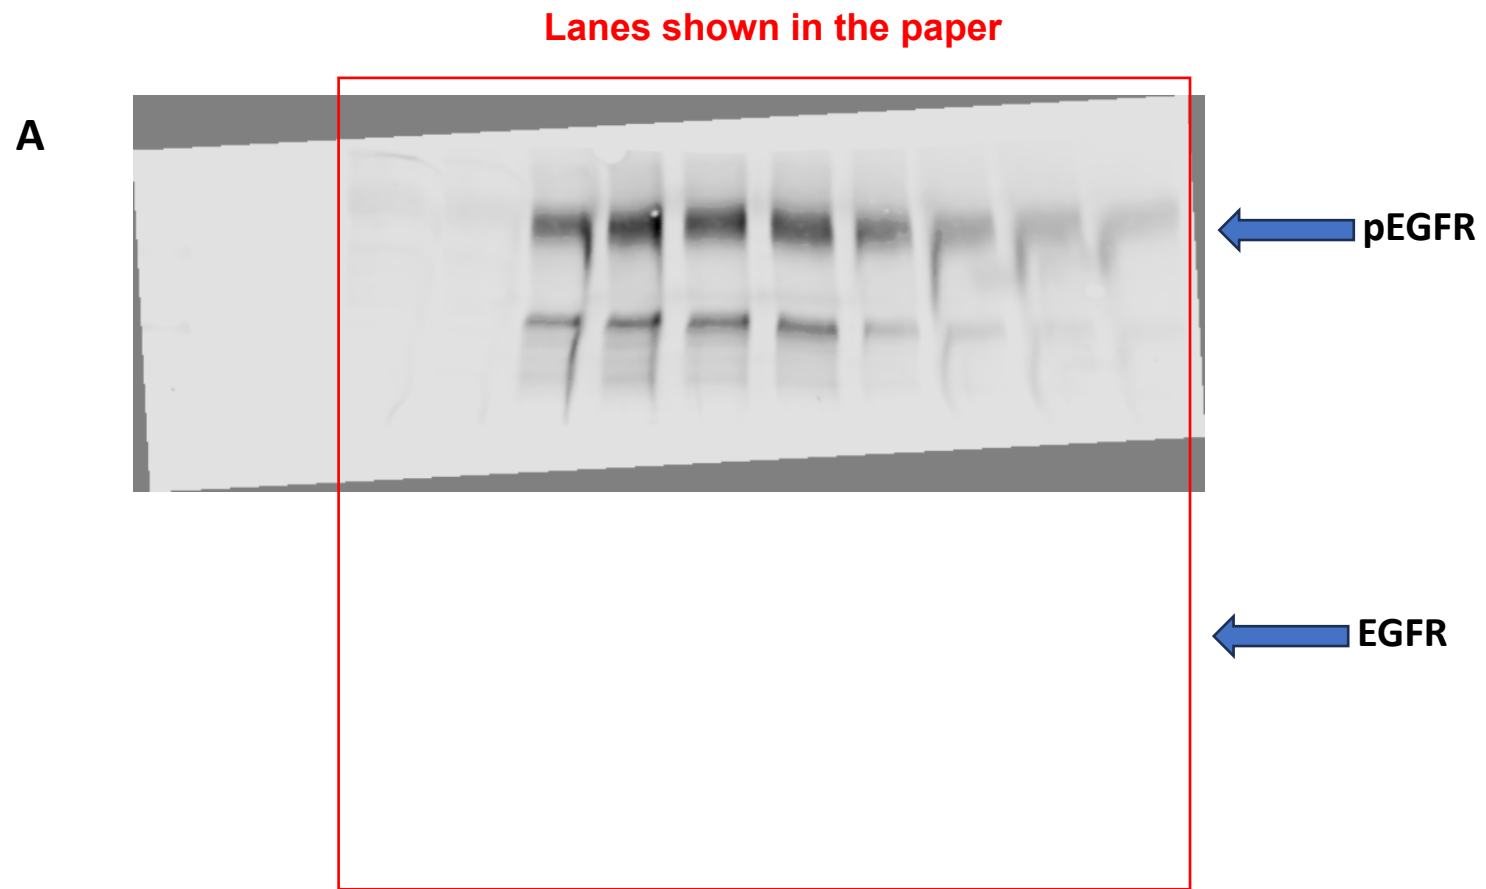

Supplement: jci-134-175158-s162.pdf [file jci-134-175158-s162.pdf]
